# Supplementary material for: Reaction between HN and SN: a possible channel for the interstellar formation of N2 and SH in the cold interstellar clouds
Source: Royal Society of Chemistry journal article supplement (doi:10.1039/c5cp05190h), 2015-01-01

## **Supporting Information**

**Reaction between HN and SN: A possible channel for the interstellar formation of N<sub>2</sub> and  
SH in the cold interstellar clouds.**

Authors: Priya Bhasi, Zanele P. Nhlabatsi, Sanyasi Sitha\*

**Department of Chemistry, University of Johannesburg, PO Box 524, Auckland Park,  
Johannesburg, South Africa 2006**

**Table S1:** Relative energies of various isomers and transition states of the [H,N,N,S] potential energy surface using B3LYP/aug-cc-pvtz, MP2/6-31++G(3df,2pd) and G3B3 methods.

| species                                   | B3LYP/<br>AUG-CC-pVTZ | MP2/<br>6-31++G(3df,2pd) | G3B3  |
|-------------------------------------------|-----------------------|--------------------------|-------|
| <sup>3</sup> NH+ <sup>2</sup> NS          | 0.0                   | 0.0                      | 0.0   |
| NH-NS Complex                             | -0.9                  | -2.0                     | -1.5  |
| <sup>2</sup> <sub>1</sub> cis-HNSN        | -47.2                 | -54.0                    | -48.6 |
| <sup>2</sup> <sub>2</sub> trans-HNSN      | -45                   | -51.2                    | -44.9 |
| <sup>2</sup> <sub>3</sub> cis-HNNS        | -71.7                 | -68.4                    | -65.7 |
| <sup>2</sup> <sub>4</sub> trans-HNNS      | -74.4                 | -71.0                    | -65.8 |
| <sup>2</sup> <sub>5</sub> cNN(H)S         | -42.5                 | -45.2                    | -38.9 |
| <sup>2</sup> <sub>6</sub> cNS(H)N         | -32.4                 | -38.1                    | -28.1 |
| <sup>2</sup> <sub>7</sub> NN(H)S          | -51.6                 | -46.8                    | -42.3 |
| <sup>2</sup> <sub>8</sub> NS(H)N          | 16.2                  | 5.3                      | 11.4  |
| <sup>2</sup> <sub>9</sub> NS(H)N          | 28                    | 122.3                    | 22.7  |
| T <sub>1</sub> ( <sup>2</sup> TS1/2)      | -31.6                 | -36.5                    | -31.7 |
| T <sub>2</sub> ( <sup>2</sup> TS1/5)      | -13.4                 | 7.7                      | -11.7 |
| T <sub>3</sub> ( <sup>2</sup> TS2/5)      | -13.3                 | -14.2                    | -7.9  |
| T <sub>4</sub> ( <sup>2</sup> TS3/4)      | -68                   | -64.9                    | -61.2 |
| T <sub>5</sub> ( <sup>2</sup> TS3/5)      | -29.4                 | -8.5                     | -24.5 |
| T <sub>6</sub> ( <sup>2</sup> TS4/5)      | -52.8                 | -29                      | -26.5 |
| T <sub>7</sub> ( <sup>2</sup> TS2/8)      | 24.6                  | 10                       | 16.8  |
| T <sub>8</sub> ( <sup>2</sup> TS4/7)      | -20                   | -20.1                    | -14.5 |
| T <sub>9</sub> ( <sup>2</sup> TS6/8)      | 38                    | 54.7                     | 52.1  |
| T <sub>10</sub> ( <sup>2</sup> TS5/7)     | -27.9                 | -5.6                     | -2.1  |
| ST <sub>1</sub> ( <sup>2</sup> TSC/4)     | 1.3                   | --                       | 3.0   |
| ST <sub>2</sub> ( <sup>2</sup> TSC/3)     | 4.6                   | --                       | 8.7   |
| T <sub>11</sub> ( <sup>2</sup> TSC/1)     | -0.3                  | --                       | -0.9  |
| T <sub>12</sub> ( <sup>2</sup> TS3/N2+SH) | -44.3                 | -35.8                    | -39.2 |
| T <sub>13</sub> ( <sup>2</sup> TS5/N2+SH) | -9.8                  | -11                      | -4.7  |

**Table S2:** Harmonic vibration frequencies ( $\text{cm}^{-1}$ ), IR intensities in  $\text{KM/mol}$  (in parentheses) and dipole moment of isomers of  $[\text{H,N,N,S}]$  potential energy surface using the B3LYP/6-31++G(3df,2pd) and MP2/6-31++G(3df,2pd) methods.

| Species                   | Frequencies (Infrared Intensity)                                                                                            | Dipole Moment    |
|---------------------------|-----------------------------------------------------------------------------------------------------------------------------|------------------|
| C complex                 | 46 (1) 48 (0.1) 89 (1) 279 (98) 293 (99) 1268 (5)<br>19 (4) 30 (1) 105 (1) 277 (105) 307 (106) 1568 (16)                    | 3.9070<br>3.8138 |
| <sup>2</sup> 1 cis-HNSN   | 329 (41) 669 (89) 950 (78) 1023 (36) 1116 (4) 3454 (26)<br>337 (47) 661 (76) 980 (51) 1067 (40) 1144 (30) 3465 (34)         | 0.5804<br>0.3218 |
| <sup>2</sup> 2 trans-HNSN | 346 (11) 614 (61) 955 (68) 1051 (81) 1123 (4) 3465 (46)<br>357 (13) 618 (51) 1025 (39) 1074 (41) 1126 (43) 3478 (59)        | 2.8427<br>3.1019 |
| <sup>2</sup> 3 cis-HNNS   | 382 (10) 658 (37) 785 (24) 1244 (240) 1660 (361) 3182 (3)<br>402 (28) 403 (1) 870 (51) 1231 (292) 2183 (1243) 3294 (26)     | 1.5476<br>1.7099 |
| <sup>2</sup> 4 trans-HNNS | 423 (11) 664 (83) 823 (40) 1293 (222) 1613 (250) 3340 (11)<br>448 (11) 487 (114) 934 (139) 1222 (207) 1992 (1356) 3409 (46) | 1.3660<br>1.2037 |
| <sup>2</sup> 5 cNN(H)S    | 512 (57) 680 (18) 1006 (42) 1080 (17) 1248 (36) 3340 (5)<br>614 (60) 777 (9) 1040 (32) 1096 (21) 1258 (33) 3401 (17)        | 1.6612<br>1.6509 |
| <sup>2</sup> 6 cNS(H)N    | 495 (1) 552 (1) 659 (12) 1010 (4) 1350 (5) 2574 (2)<br>630 (0.1) 636 (0.1) 780 (9) 1046 (5) 1288 (3) 2687 (1)               | 2.9331<br>2.9287 |
| <sup>2</sup> 7 NN(H)S     | 333 (13) 720 (52) 802 (65) 1313 (30) 1403 (142) 3286 (26)<br>407 (15) 792 (72) 910 (15) 1312 (21) 1458 (8) 3383 (37)        | 2.5000<br>2.8361 |
| <sup>2</sup> 8 NS(H)N     | 318 (51) 462 (5) 895 (29) 967 (5) 1357 (24) 2338 (26)<br>336 (32) 830 (10) 912 (53) 1111 (13) 1474 (55) 2429 (44)           | 2.5878<br>2.7749 |
| <sup>2</sup> 9 NS(H)N     | 391 (1) 411 (29) 992 (2) 1109 (9) 2300 (3843) 2328 (19)<br>336 (1) 395 (23) 892 (6) 1251 (27) 2447 (9) 88096 ( )            | 1.8090<br>1.5627 |

**Table S3:** Harmonic vibration frequencies ( $\text{cm}^{-1}$ ), IR intensities (KM/mol) (in parentheses) and dipole moment of transition states of [H ,N,N,S] potential energy surface using B3LYP/6-31++G(3df,2pd) and MP2/6-31++G(3df,2pd) (*Italics*) methods.

| Species         | Frequencies (Infrared Intensity)                                                                                             | Dipole Moment    |
|-----------------|------------------------------------------------------------------------------------------------------------------------------|------------------|
| T <sub>1</sub>  | 726i (144) 320 (6) 603 (177) 978 (10) 1122 (9) 3552 (115)<br>907i (195) 394 (60) 785 (462) 1107 (229) 2245 (6357) 3549 (236) | 2.1416<br>1.9921 |
| T <sub>2</sub>  | 988i (131) 683 (19) 736 (21) 859 (25) 1214 (57) 3440 (42)<br>2218i (3785) 752 (60) 958 (34) 1030 (116) 1314 (49) 3620 (38)   | 1.8781<br>2.5060 |
| T <sub>3</sub>  | 1036i (193) 706 (40) 718 (21) 859 (46) 1152 (26) 3345 (3)<br>2315i (1899) 775 (29) 924 (3) 1207 (71) 1384 (207) 3330 (6)     | 2.5101<br>2.7206 |
| T <sub>4</sub>  | 399i (4) 430 (0) 809 (10) 1254 (173) 1739 (243) 3103 (30)<br>430i (5) 329 (1) 863 (0.1) 1179 (161) 2437 (1091) 3289 (28)     | 1.4049<br>1.5301 |
| T <sub>5</sub>  | 1153i (11) 601 (58) 709 (17) 1140 (159) 1306 (31) 3268 (6)<br>1057i (54) 428 (68) 660 (17) 1198 (87) 1336 (45) 3261 (20)     | 1.7017<br>1.8038 |
| T <sub>6</sub>  | 1011i (100) 625 (64) 746 (62) 1214 (74) 1291 (26) 3172 (2)<br>2002i (123) 653 (35) 958 (89) 1160 (66) 1410 (9) 3216 (1)      | 1.3363<br>1.1733 |
| T <sub>7</sub>  | 1431i (14) 285 (3) 360 (13) 967 (8) 1388 (26) 1999 (1)<br>1326i (12) 361 (11) 581 (0.2) 1111 (16) 1549 (46) 2256 (12)        | 1.9050<br>2.0514 |
| T <sub>8</sub>  | 2268i (35) 433 (44) 470 (15) 736 (71) 1525 (327) 2393 (67)<br>2377i (9) 461 (13) 472 (46) 831 (33) 1603 (108) 2702 (108)     | 1.5207<br>1.9742 |
| T <sub>9</sub>  | 344i (23) 491 (16) 747 (22) 868 (2) 892 (2) 2125 (48)<br>896i (434) 608 (56) 716 (351) 1077 (93) 1655 (312) 2111 (82)        | 3.3422<br>3.4482 |
| T <sub>10</sub> | 1023i (238) 577 (23) 777 (61) 1217 (40) 1408 (62) 3250 (10)<br>1040i (13) 597 (27) 847 (99) 1165 (32) 1233 (32) 3464 (35)    | 2.5466<br>1.8520 |
| ST <sub>1</sub> | 217i (6) 154 (9) 249 (79) 512 (116) 1192 (45) 3326 (6)                                                                       | 0.9295           |
| ST <sub>2</sub> | 292i (4) 142 (49) 143 (5) 559 (94) 1136 (56) 3276 (21)                                                                       | 2.7014           |
| T <sub>11</sub> | 54i (30) 50 (2) 53 (101) 141 (99) 1256 (5) 3288 (10)                                                                         | 0.4932           |
| T <sub>12</sub> | 1679i (33) 383 (27) 661 (8) 902 (19) 1637 (69) 1760 (46)<br>1904i (527) 675 (4) 797 (8) 1012 (29) 1995 (149) 2898 (404)      | 0.8201<br>0.7390 |
| T <sub>13</sub> | 1514i (203) 479 (1) 516 (3) 902 (28) 1319 (68) 1711 (9)<br>1473i (347) 559 (1) 708 (15) 956 (37) 1517 (97) 1968 (20)         | 1.5898<br>1.6220 |

## **Fragments:**

By the thorough analysis of the isomers we have visualized many fragmentation pathways and optimized all the possible fragments. All the optimized fragments are shown in the Figure S1, in the figure along with the fragment names, their electronic states are also presented as superscripts. From the complex (C) and isomers 1-4, the most obvious fragmentation leads to NH and NS. Minimizations of these two fragments show that SN is in doublet state, whereas for NH we found that its triplet state is more stable (approximately 50.3 kcal/mol) than the singlet state. Stability of the triplet state is quite obvious as it is isoelectronic with both O and CH<sub>2</sub>. Interesting to note that the complex energy is equal to that of the total energies of the two fragments NH and NS, which is a clear indication that the complex formed, is not a hydrogen bonded complex. If it has to be a hydrogen bonded complex, then by VSEPR theory the structure could have been bent than linear. Rather it can be treated as some kind of weak interaction and needs further detailed investigations to ascertain its nature of bonding. Analysis of isomer 1 and 2 also shows that the other fragmentation process will lead to fragments like HNS and N. Optimization of HNS fragment shows that its triplet state is around 1.3 kcal/mol more stable than the corresponding singlet state. Similarly the HNS fragments can also be obtained from the fragmentation of the isomers 5, 6 and 7. Analysis of the isomers 3, 4, 5 and 7 shows that one of the fragmentation channels from this molecule will lead to the formation of HNN and S. Optimized structure of the HNN fragment shows that it is in doublet state and the structure is bent. The other fragmentation channel for the isomers 3, 4, 5, 6 and 7 is the formation of NNS and H. Analysis of the structure of the NNS shows that one is almost in linear form, whereas the other form is the cyclic ring structure, and in both the forms the singlet state is found to be highly stable compared to the triplet state. The linear form of the NNS might be considered as the

fragment from the isomers 3, 4 and 7, whereas the ring from of NNS might be considered as a fragment from the isomer 5 and 6 exclusively. Now fragmentation of isomer 8 and 9 will lead to the formation of NSN and H. Analysis of the optimized structure of the NSN shows that its singlet isomer (linear structure) is around 9.6 kcal/mol more stable than its triplet isomer (bent structure). The other fragmentation process which is important as it will give the N<sub>2</sub> (with SH as the second fragment). Analysis of the isomers shows that isomers capable of this might be isomers 3, 4, 5, 6 and 7.

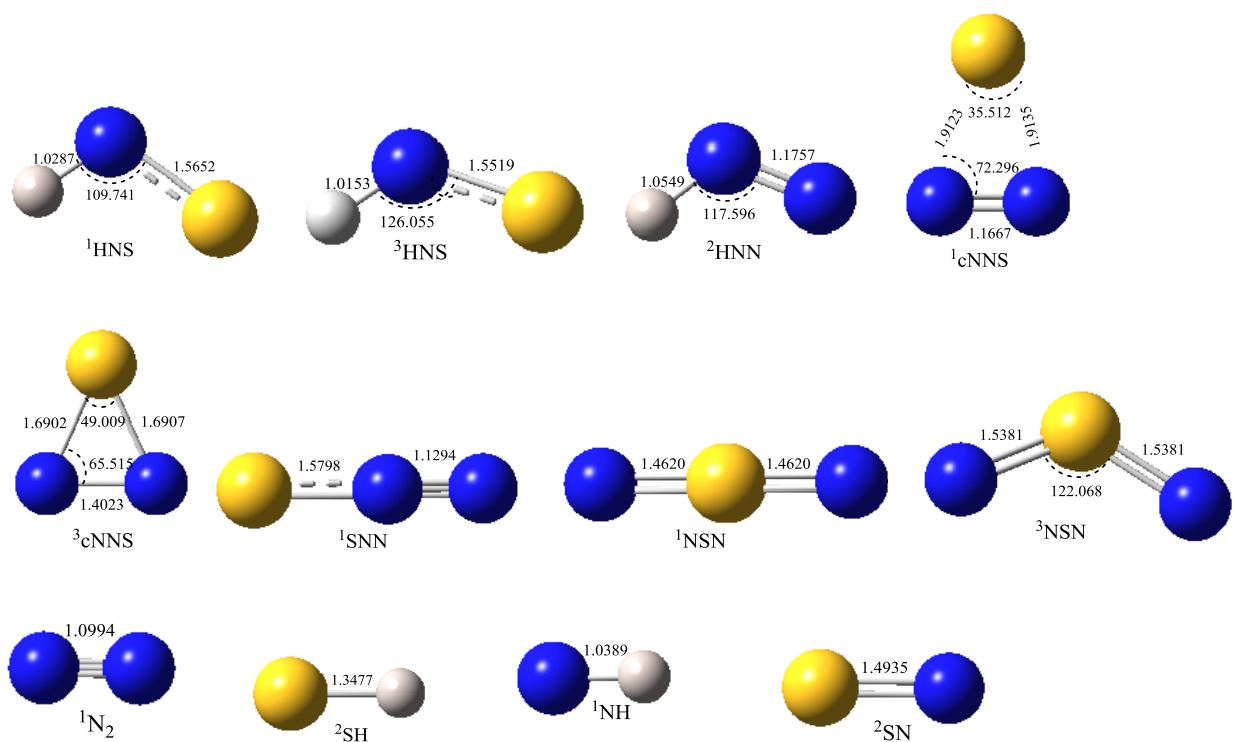

**Figure S1:** Optimized geometries of various possible fragments of the [H, N, N, S] potential energy surface using B3LYP/6-31++G (3df,2pd) method. Bond lengths are in angstroms and bond angles are in degrees.

**MP2/6-31++G(3df,2pd) geometries of isomers and transition states**

**Isomer 1**

|   |             |             |            |
|---|-------------|-------------|------------|
| H | -1.01202700 | -1.50008300 | 0.00000000 |
| N | -1.27083800 | -0.50805300 | 0.00000000 |
| S | 0.00000000  | 0.41289900  | 0.00000000 |
| N | 1.41541300  | -0.22141800 | 0.00000000 |

**Isomer 2**

|   |             |             |            |
|---|-------------|-------------|------------|
| H | -1.99670200 | -0.11475500 | 0.00000000 |
| N | -1.14900700 | -0.69106000 | 0.00000000 |
| S | 0.00000000  | 0.38760500  | 0.00000000 |
| N | 1.43425000  | -0.17850000 | 0.00000000 |

**Isomer 3**

|   |             |             |            |
|---|-------------|-------------|------------|
| H | 1.84429300  | 0.88566100  | 0.00000000 |
| N | 0.94382100  | 1.39448700  | 0.00000000 |
| N | 0.00000000  | 0.54642300  | 0.00000000 |
| S | -0.52819000 | -0.90450200 | 0.00000000 |

**Isomer 4**

|   |             |             |            |
|---|-------------|-------------|------------|
| H | 0.64683600  | 2.25856100  | 0.00000000 |
| N | 1.00944700  | 1.29740200  | 0.00000000 |
| N | 0.00000000  | 0.51924900  | 0.00000000 |
| S | -0.48206000 | -0.93594500 | 0.00000000 |

**Isomer 5**

|   |             |             |             |
|---|-------------|-------------|-------------|
| H | -1.25191400 | -0.87749700 | 0.77009000  |
| N | -0.94308200 | -0.53574100 | -0.14804200 |
| N | -0.63828300 | 0.83166100  | 0.02213600  |
| S | 0.77009100  | -0.07462100 | 0.00695300  |

**Isomer 6**

|   |            |             |             |
|---|------------|-------------|-------------|
| H | 1.04772800 | 0.00203200  | 1.21129300  |
| S | 0.71319800 | -0.00022100 | -0.09150400 |

|   |             |             |            |
|---|-------------|-------------|------------|
| N | -0.89010600 | -0.66420600 | 0.01835700 |
| N | -0.88973600 | 0.66442000  | 0.01775200 |

### Isomer 7

|   |             |             |            |
|---|-------------|-------------|------------|
| H | -0.73353100 | 1.38942300  | 0.00000000 |
| N | 0.00000000  | 0.66988400  | 0.00000000 |
| N | 1.17915500  | 1.16968200  | 0.00000000 |
| S | -0.47003500 | -0.89164900 | 0.00000000 |

### Isomer 8

|   |             |             |            |
|---|-------------|-------------|------------|
| H | -0.52611200 | 1.44408900  | 0.00000000 |
| N | -1.38725400 | -0.51725600 | 0.00000000 |
| S | 0.00000000  | 0.17475800  | 0.00000000 |
| N | 1.46241300  | -0.08849000 | 0.00000000 |

### Isomer 9

|   |            |             |             |
|---|------------|-------------|-------------|
| H | 0.00000000 | 0.00000000  | 1.42598900  |
| S | 0.00000000 | 0.00000000  | 0.06144400  |
| N | 0.00000000 | 1.50805100  | -0.17207800 |
| N | 0.00000000 | -1.50805100 | -0.17207800 |

### Complex

|   |             |             |             |
|---|-------------|-------------|-------------|
| N | 3.29594400  | 0.00029600  | 0.00006700  |
| H | 2.26627900  | 0.00028500  | -0.00059600 |
| N | -0.05501800 | -0.00105900 | 0.00000100  |
| S | -1.55954800 | 0.00031600  | 0.00000800  |

### T1

|   |             |             |             |
|---|-------------|-------------|-------------|
| H | -1.84750300 | 0.58578600  | -0.63475100 |
| N | -1.38166300 | 0.13958500  | 0.15450700  |
| S | 0.08240000  | -0.21410400 | -0.04422000 |
| N | 1.45724800  | 0.26611100  | 0.03724500  |

### T2

|   |            |            |             |
|---|------------|------------|-------------|
| H | 1.34602600 | 0.56050200 | 0.71317700  |
| N | 1.13623200 | 0.02702900 | -0.11954100 |



|   |             |             |             |
|---|-------------|-------------|-------------|
| S | -0.35287700 | -0.50302500 | 0.02046000  |
| N | -0.52194500 | 1.04267200  | -0.02910800 |

### **T3**

|   |             |             |             |
|---|-------------|-------------|-------------|
| H | 1.74425400  | 0.53688300  | 0.64628400  |
| N | 1.05843100  | 0.58587800  | -0.11892000 |
| S | -0.03627800 | -0.57626300 | -0.00095800 |
| N | -1.22468700 | 0.65459700  | 0.02878400  |

### **T4**

|   |             |             |            |
|---|-------------|-------------|------------|
| H | 1.06270500  | 1.99811800  | 0.00000000 |
| N | 0.06849300  | 1.71547500  | 0.00000000 |
| N | 0.00000000  | 0.44854100  | 0.00000000 |
| S | -0.09638500 | -1.07163900 | 0.00000000 |

### **T5**

|   |             |             |             |
|---|-------------|-------------|-------------|
| H | -1.07194700 | -1.03427400 | 0.63982300  |
| N | -1.25077900 | -0.36766900 | -0.12649600 |
| N | -0.58858800 | 0.73105100  | 0.06219900  |
| S | 0.87172000  | -0.09433800 | -0.01185900 |

### **T6**

|   |             |             |             |
|---|-------------|-------------|-------------|
| H | -1.84225900 | -0.49331000 | 0.66391600  |
| N | -1.16613100 | -0.42502400 | -0.12395800 |
| N | -0.56301600 | 0.73701000  | -0.00334800 |
| S | 0.87164300  | -0.10566200 | 0.01420100  |

### **T7**

|   |             |             |             |
|---|-------------|-------------|-------------|
| H | -0.87437600 | 1.24251900  | 0.00048300  |
| N | -1.45134800 | -0.28450000 | 0.00008900  |
| S | 0.03509200  | 0.12510800  | -0.00012800 |
| N | 1.49604900  | -0.17896400 | 0.00013400  |

### **T8**

|   |             |             |             |
|---|-------------|-------------|-------------|
| H | -1.36532800 | 1.01239300  | -0.00193200 |
| N | -1.70568000 | -0.25252700 | -0.00026000 |

|   |             |             |             |
|---|-------------|-------------|-------------|
| N | -0.51101600 | 0.22163500  | 0.00088500  |
| S | 1.05513800  | -0.04975900 | -0.00015300 |

### **T9**

|   |             |             |             |
|---|-------------|-------------|-------------|
| H | -0.67451600 | -1.33239000 | 0.71837100  |
| S | 0.06921300  | -0.42289600 | -0.08604900 |
| N | -1.16864200 | 0.58977900  | 0.00934700  |
| N | 1.10680000  | 0.56718100  | 0.08471100  |

### **T10**

|   |             |             |             |
|---|-------------|-------------|-------------|
| H | 0.89692200  | 1.26184400  | -0.60200200 |
| N | 0.66929300  | 0.60309300  | 0.14433100  |
| N | 1.28531600  | -0.58234100 | -0.03305900 |
| S | -0.91119900 | -0.08794400 | -0.01105600 |

### **T11**

|   |             |             |            |
|---|-------------|-------------|------------|
| H | 2.20317400  | -0.10357900 | 0.00000000 |
| N | 2.26486600  | -1.13232400 | 0.00000000 |
| N | 0.00000000  | 1.04290400  | 0.00000000 |
| S | -1.12857700 | 0.04559500  | 0.00000000 |

### **T12**

|   |             |             |             |
|---|-------------|-------------|-------------|
| H | 0.26934900  | 1.12169400  | 0.00015100  |
| N | 1.33276500  | 0.39031600  | 0.00003300  |
| N | 0.80010000  | -0.62076000 | -0.00009500 |
| S | -0.94996200 | 0.03071400  | 0.00001800  |

### **T13**

|   |             |             |             |
|---|-------------|-------------|-------------|
| H | -0.03555900 | 1.03797600  | 0.73813500  |
| N | 0.95471400  | 0.57642600  | -0.11364500 |
| N | 0.90585300  | -0.65983400 | 0.06922400  |
| S | -0.81177600 | -0.02838200 | -0.02670000 |

Two reaction transition states obtained from the B3LYP/6-31++G(3df,2pd) method.

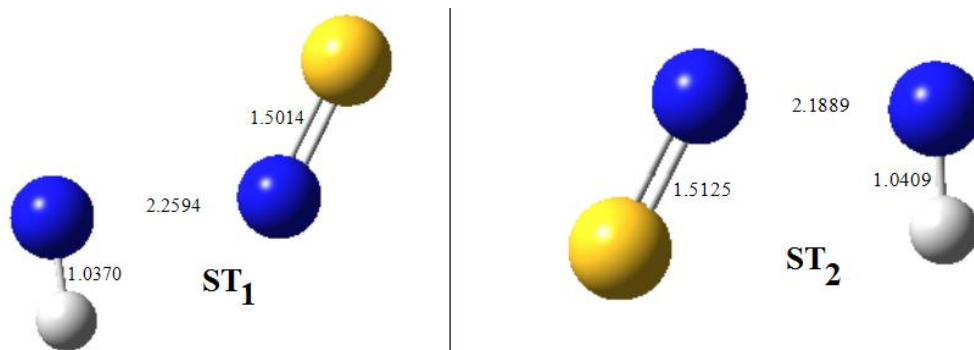

Optimized geometries and the Cartesian coordinates of the complex and the T<sub>11</sub> obtained using wB97XD/6-31++G(d,p) method.

**COMPLEX**

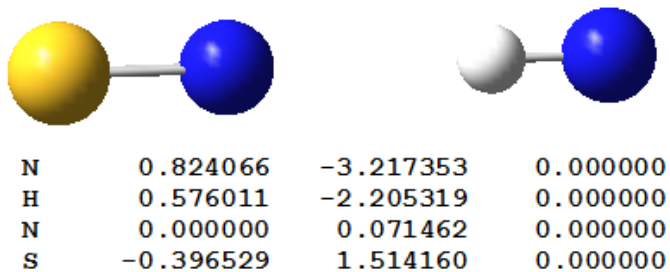

**TRANSITION STATE, T<sub>11</sub>**

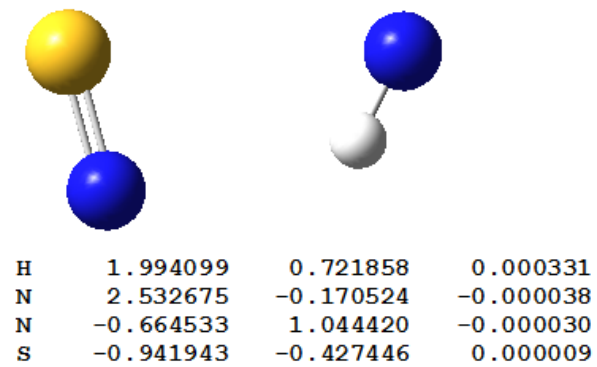

Supplement: c5cp05190h1.pdf [file c5cp05190h1.pdf]
